# Supplementary material for: PRC1 Catalytic Activity Is Central to Polycomb System Function
Source: PubMed Central journal article supplement (PMC7033600; doi:10.1016/j.molcel.2019.12.001), 2020-02-20
Supplement: mmc1.pdf [file mmc1.pdf]

**Molecular Cell, Volume 77**

**Supplemental Information**

**PRC1 Catalytic Activity Is Central  
to Polycomb System Function**

**Neil P. Blackledge, Nadezda A. Fursova, Jessica R. Kelley, Miles K. Huseyin, Angelika Feldmann, and Robert J. Klose**

(A)

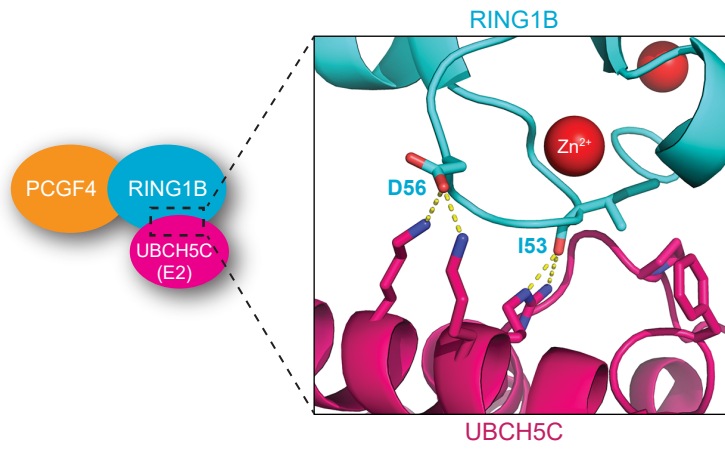

(B)

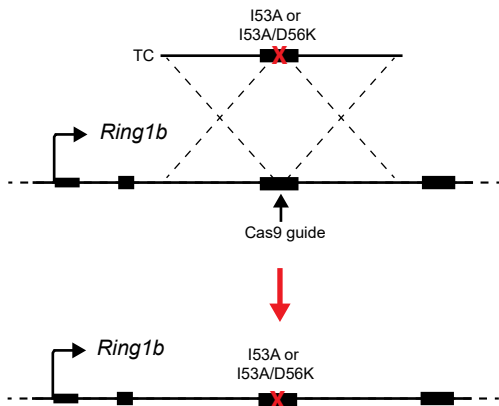

(C)

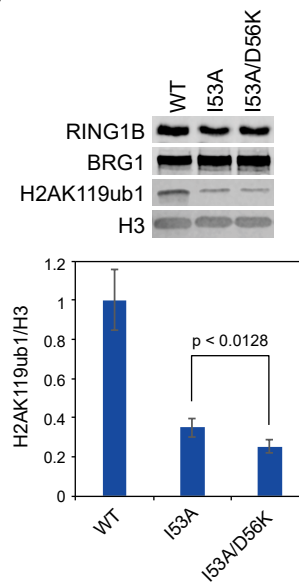

(D)

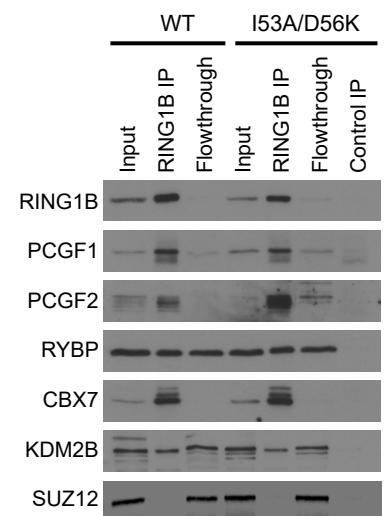

Figure S1

**Figure S1. Related to Figure 1.**

- (A)** A schematic of the crystal structure illustrating the RING1B-PCGF4 dimer bound to E2 ubiquitin conjugating enzyme (UBCH5C) (PDB ID: 3RPG) (Bentley et al., 2011). The key amino acids that mediate RING1B-E2 interaction are indicated.
- (B)** A schematic illustrating how I53A or I53A/D56K mutations were introduced into the endogenous *Ring1b* gene in mouse ESCs (TC = targeting construct).
- (C)** Western blot analysis of RING1B (with BRG1 as a loading control) and H2AK119ub1 (with H3 as a loading control) in RING1B<sup>WT</sup>, RING1B<sup>I53A</sup> and RING1B<sup>I53A/D56K</sup> ESCs (*top panel*). Quantification of H2AK119ub1 levels from the western blot analysis above (*bottom panel*). Error bars show SEM (n = 6) and the p-value denotes statistical significance calculated by a paired one-tailed Student's t-test.
- (D)** Immunoprecipitation of RING1B from RING1B<sup>WT</sup> or RING1B<sup>I53A/D56K</sup> ESCs followed by western blot for cPRC1 and vPRC1 components as indicated. Western blot for SUZ12 (a PRC2 component) was used as a negative control. For RING1B<sup>I53A/D56K</sup> ESCs, a control IP was performed with an isotype control antibody.

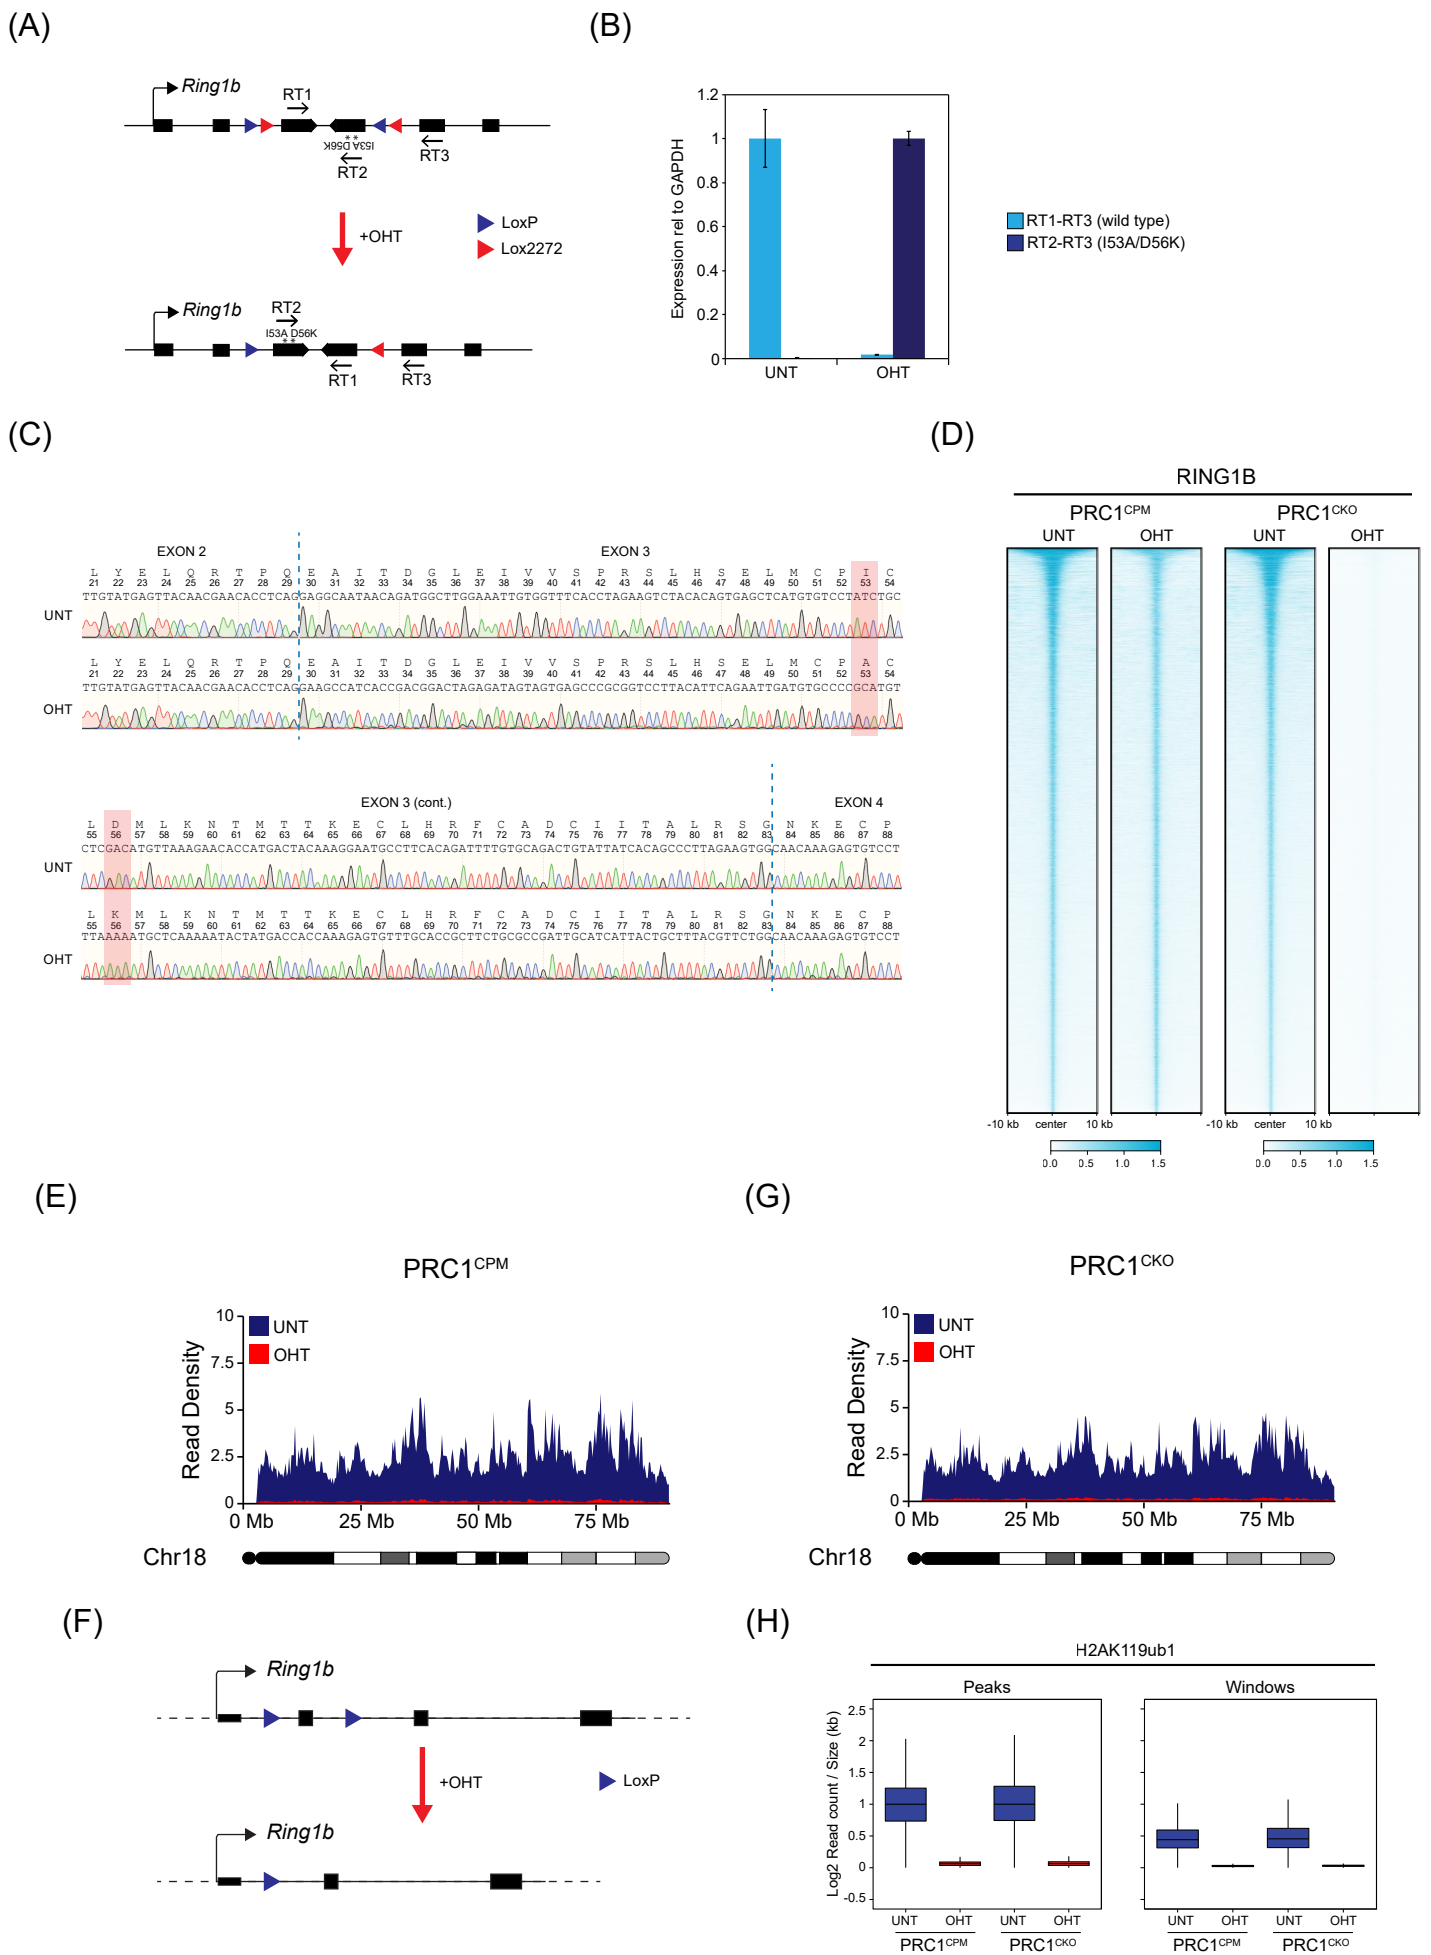

Figure S2

**Figure S2. Related to Figure 2.**

- (A)** A schematic of the endogenous *Ring1b* allele in PRC1<sup>CPM</sup> cell line before and after addition of OHT, showing positions of the primers used for RT-qPCR quantification of conversion from *Ring1b*<sup>WT</sup> to *Ring1b*<sup>I53A/D56K</sup>. In untreated cells, incorporation of wild-type exon 3 into *Ring1b* mRNA gives RT-qPCR signal from the primer pair RT1-RT3, but not RT1-RT2. Following OHT treatment and flipping of the exon 3 cassette, incorporation of I53A/D56K version of exon 3 into *Ring1b* mRNA gives RT-qPCR signal from the primer pair RT2-RT3, but not RT1-RT3.
- (B)** RT-qPCR validation of PRC1<sup>CPM</sup> line using primers described in (A). Error bars represent SEM (n=4).
- (C)** DNA sequencing traces of *Ring1b* mRNA in untreated and OHT-treated PRC1<sup>CPM</sup> cells, showing complete conversion from RING1B<sup>WT</sup> to RING1B<sup>I53A/D56K</sup>. Vertical dashed lines indicate boundaries between exons. Amino acid sequences are shown above corresponding DNA sequence, with I53A and D56K positions highlighted in red. Wild-type and I53A/D56K mutant versions of exon 3 were engineered to be different at wobble position of each triplet codon, to allow each exon to be easily distinguished and minimize formation of secondary RNA structures that could impact on splicing.
- (D)** Heatmap analysis of cChIP-seq for RING1B at RING1B-bound sites in PRC1<sup>CPM</sup> and PRC1<sup>CKO</sup> cells. The genomic intervals were sorted based on RING1B occupancy in untreated PRC1<sup>CKO</sup> ESCs.
- (E)** A chromosome density plot showing H2AK119ub1 cChIP-seq across chromosome 18 in untreated (blue) and OHT-treated (red) PRC1<sup>CPM</sup> cells.
- (F)** A schematic of the endogenous *Ring1b* allele in PRC1<sup>CKO</sup> cell line before and after addition of OHT, showing parallel LoxP sites flanking exon 2 (the first coding exon). OHT treatment causes CRE-mediated deletion of exon 2 which puts the rest of the *Ring1b* coding sequence out of frame, resulting in no functional protein being produced.
- (G)** A chromosome density plot showing H2AK119ub1 cChIP-seq data across chromosome 18 in untreated (blue) and OHT-treated (red) PRC1<sup>CKO</sup> cells.
- (H)** Box plots comparing the normalised H2AK119ub1 cChIP-seq signal at RING1B-bound sites and 100 kb genomic windows in PRC1<sup>CPM</sup> and PRC1<sup>CKO</sup> cells.

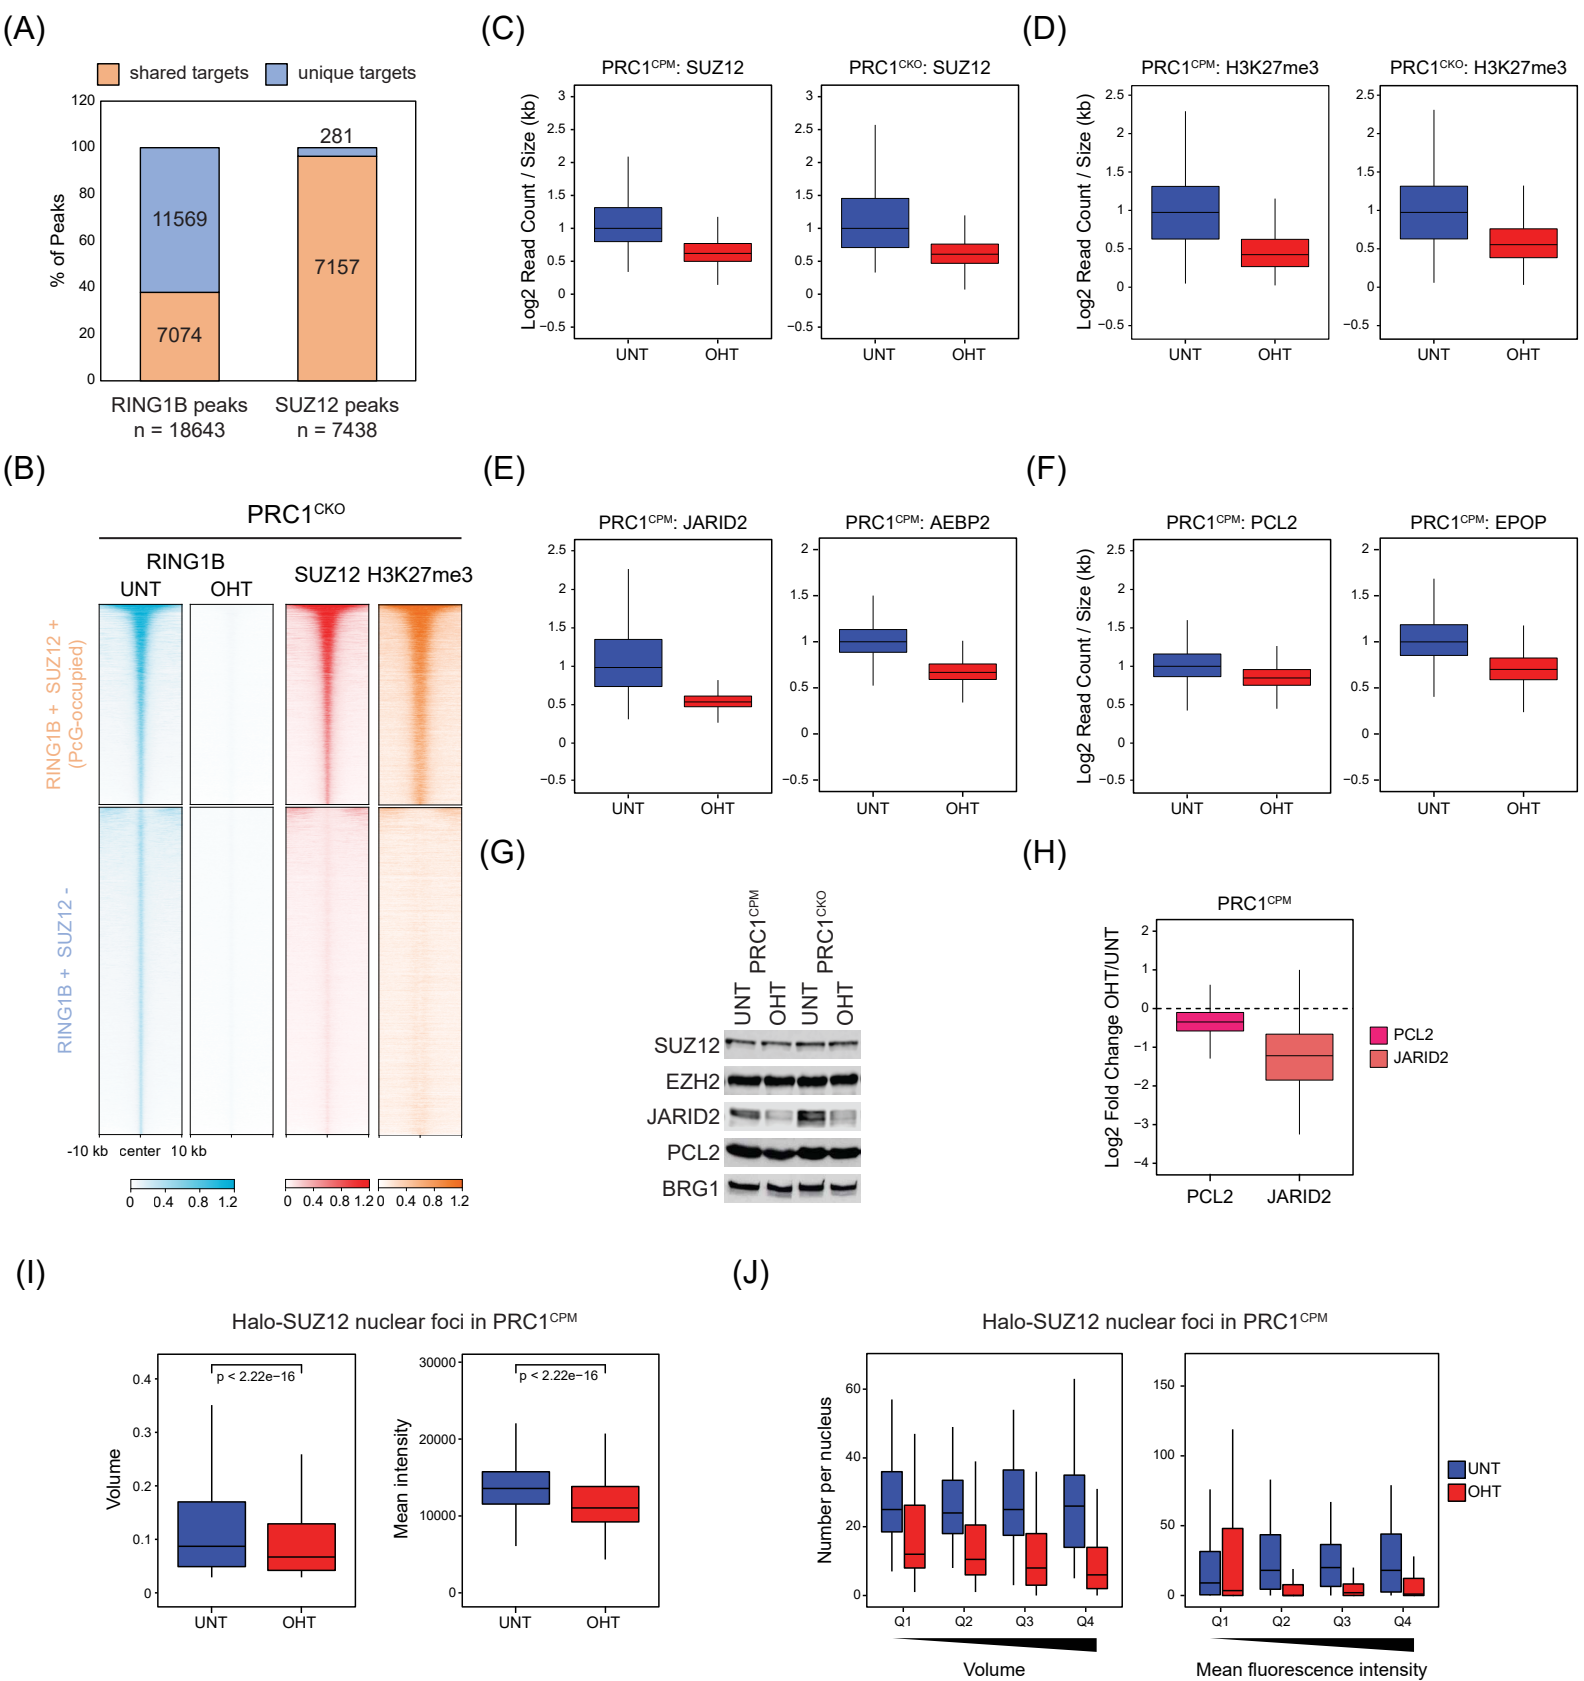

Figure S3

**Figure S3. Related to Figure 3.**

- (A)** Bar plots showing the overlap between RING1B- and SUZ12-bound genomic regions. This illustrates that PRC1 and PRC2 share a large number of target sites, with > 95% of SUZ12 peaks overlapping with RING1B peaks, while RING1B binding appears to be more broad.
- (B)** Heatmap analysis of cChIP-seq in PRC1<sup>CKO</sup> ESCs for RING1B, SUZ12 and H3K27me3 (untreated) at RING1B-bound sites divided into two groups based on the overlap with SUZ12 peaks (RING1B/SUZ12-bound or PcG-occupied (n = 7074) and only RING1B-bound (n = 11,569)). For each group, the genomic regions were sorted based on RING1B occupancy in untreated cells.
- (C)** Box plots of the normalised cChIP-seq signal for SUZ12 at PcG-occupied sites for untreated and OHT-treated PRC1<sup>CPM</sup> and PRC1<sup>CKO</sup> cells.
- (D)** Box plots of the normalised cChIP-seq signal for H3K27me3 at PcG-occupied sites for untreated and OHT-treated PRC1<sup>CPM</sup> and PRC1<sup>CKO</sup> cells.
- (E)** Box plots of the normalised cChIP-seq signal for PRC2.2-specific subunits (JARID2 and AEBP2) at PcG-occupied sites for untreated and OHT-treated PRC1<sup>CPM</sup> cells.
- (F)** Box plots of the normalised cChIP-seq signal for PRC2.1-specific subunits (PCL2 and EPOP) at PcG-occupied sites for untreated and OHT-treated PRC1<sup>CPM</sup> cells.
- (G)** Western blot analysis of PRC2 subunits (SUZ12, EZH2, JARID2 and PCL2) in untreated and OHT-treated PRC1<sup>CPM</sup> ESCs. BRG1 was used as a loading control.
- (H)** Box plot of log<sub>2</sub> fold changes in PCL2 and JARID2 binding at PcG-occupied sites following OHT treatment in PRC1<sup>CPM</sup> cells.
- (I)** Box plots comparing volumes (*left*) and mean intensities (*right*) of JF<sub>549</sub>-Halo-SUZ12 nuclear foci in PRC1<sup>CPM</sup> ESCs before (n<sub>cells</sub> = 55) and after OHT treatment (n<sub>cells</sub> = 52). Cells were counted across two independent experiments. P-values denote statistical significance calculated by a Wilcoxon rank sum test.
- (J)** Box plots comparing numbers of JF<sub>549</sub>-Halo-SUZ12 nuclear foci detected in PRC1<sup>CPM</sup> ESCs before (n<sub>cells</sub> = 55) and after OHT treatment (n<sub>cells</sub> = 52), with foci divided into quartiles based on foci volume (*left*) or mean intensities (*right*) in untreated cells (from lowest Q1 to highest Q4). Cells from two independent experiments were analysed. This shows that in the absence of PRC1 catalysis, SUZ12 nuclear foci of different volumes and intensities are lost, with largest and brightest foci being affected the most.

(A)

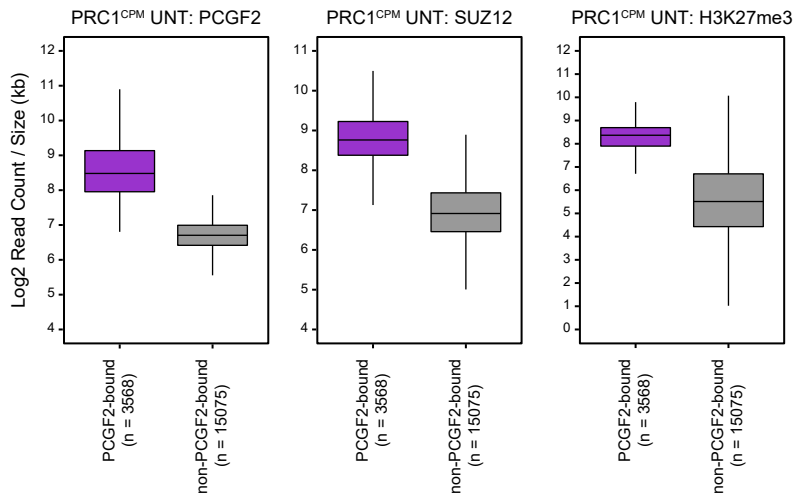

(B)

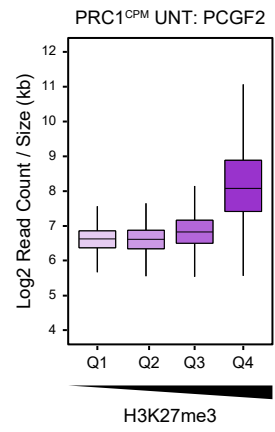

(C)

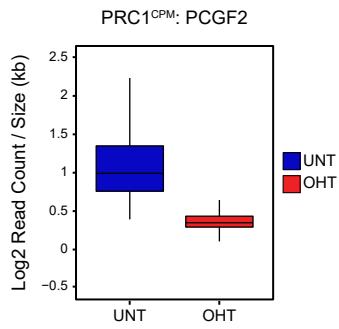

(D)

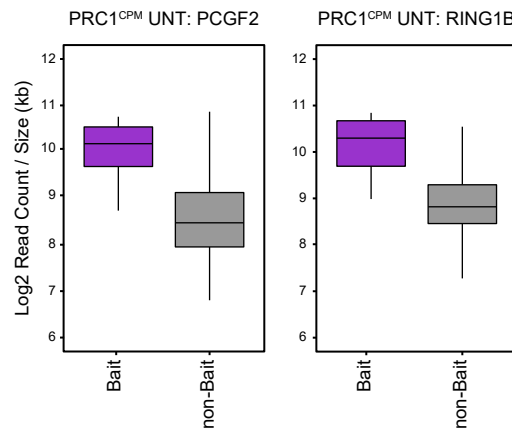

(E)

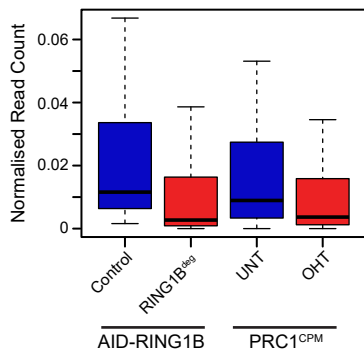

Figure S4



**Figure S4. Related to Figure 4.**

- (A) Box plots of the cChIP-seq signal for PCGF2, SUZ12 and H3K27me3 in untreated PRC1<sup>CPM</sup> cells at RING1B-bound sites divided into sites that are bound (PCGF2 target sites) or not bound by PCGF2.
- (B) Box plots comparing the cChIP-seq signal for PCGF2 in untreated PRC1<sup>CPM</sup> cells at RING1B-bound sites divided into quartiles (from lowest Q1 to highest Q4) based on H3K27me3 levels.
- (C) Box plots of the normalised cChIP-seq signal for PCGF2 at PCGF2 target sites in untreated and OHT-treated PRC1<sup>CPM</sup> ESCs.
- (D) Box plots comparing PCGF2 and RING1B cChIP-seq signal in untreated PRC1<sup>CPM</sup> cells at PCGF2 target sites used as baits in CaptureC analysis and the remaining PCGF2 target sites.
- (E) Box plot analysis of the normalised mean read count from CaptureC for the interactions between the bait Polycomb target regions and other PCGF2 target sites (n = 130) in auxin-treated *Ring1a*<sup>-/-</sup>;AID-RING1B (RING1B<sup>deg</sup>) ESCs (relative to the Control cell line with intact PRC1) and PRC1<sup>CPM</sup> cells.

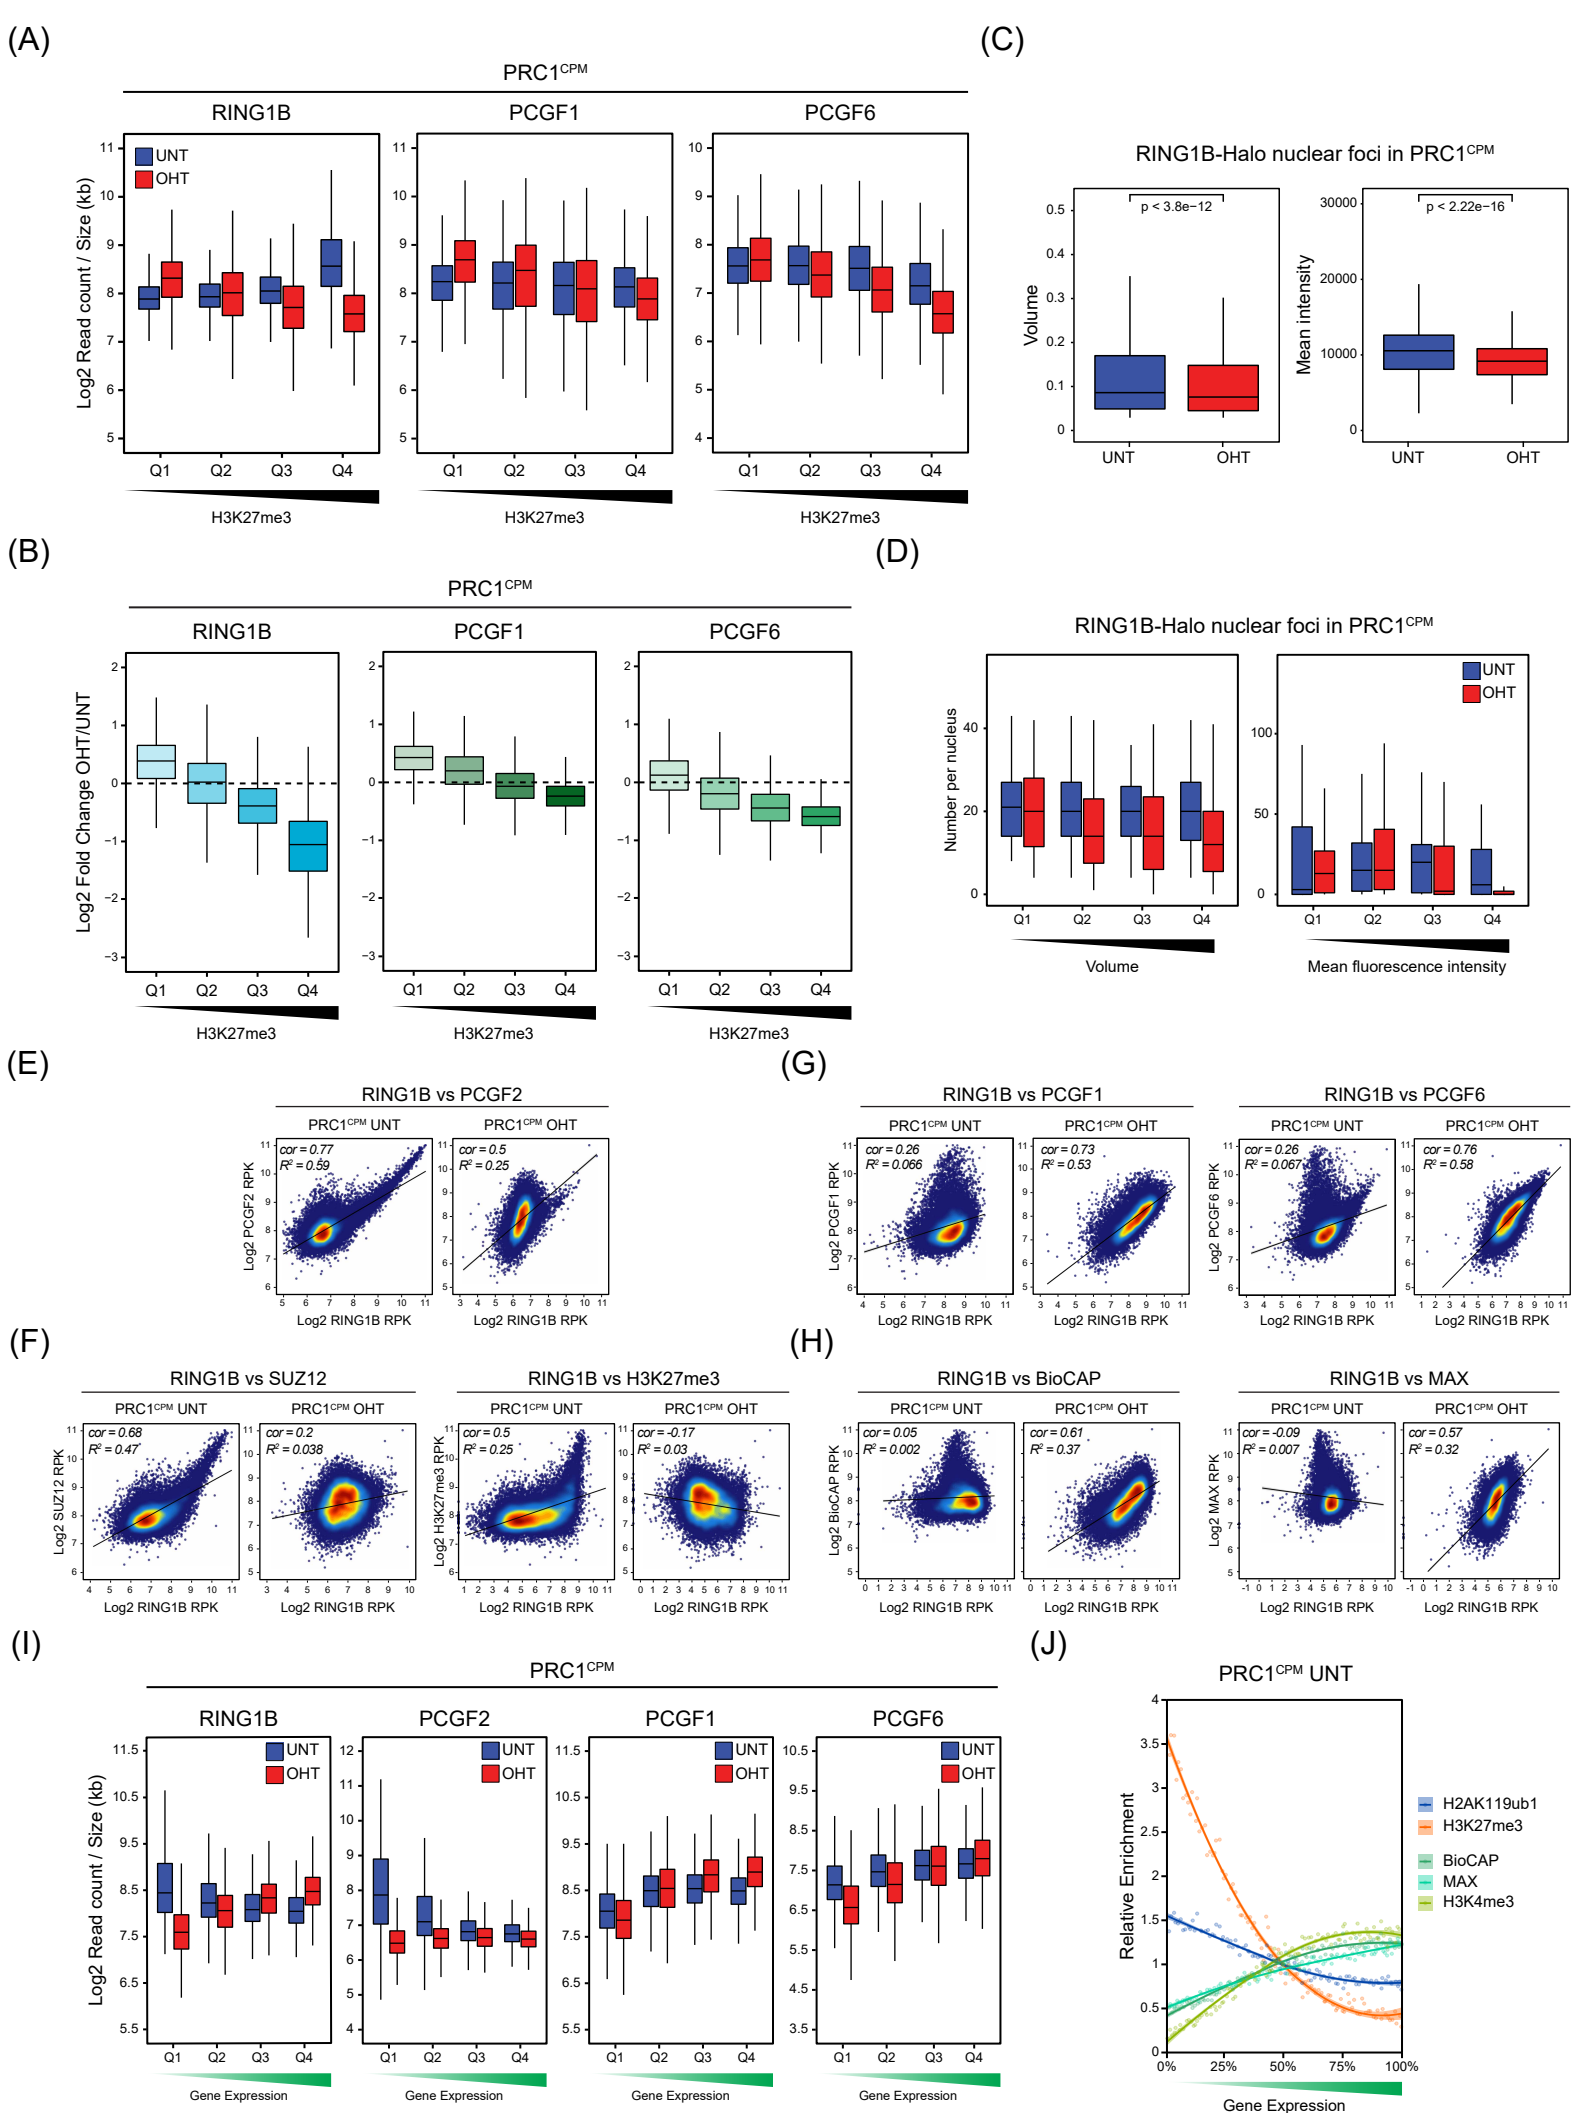

Figure S5

**Figure S5. Related to Figure 5.**

- (A) Box plots of cChIP-seq signal for RING1B, PCGF1 and PCGF6 at RING1B-bound sites divided into quartiles based on H3K27me3 levels in untreated cells (from lowest Q1 to highest Q4) in PRC1<sup>CPM</sup> ESCs before and after OHT treatment. This shows that PCGF1 and PCGF6 occupancy is largely uniform across all RING1B-bound sites with different H3K27me3 levels.
- (B) Box plots comparing changes in cChIP-seq signal for RING1B, PCGF1 and PCGF6 following OHT treatment in PRC1<sup>CPM</sup> cells at RING1B-bound sites divided into quartiles based on H3K27me3 levels in untreated cells. Together with (A), this shows that following removal of PRC1 catalytic activity, RING1B occupancy is reduced at sites with high levels of H3K27me3 (Q3 and Q4) but is retained/increased at sites with low levels of H3K27me3 (Q1 and Q2). In addition, it demonstrates that PCGF1 and PCGF6 occupancy is only modestly affected following loss of PRC1 catalytic activity, with binding of PCGF1 slightly increased at sites with low level of H3K27me3 and binding of PCGF6 moderately reduced at sites with high enrichment of H3K27me3.
- (C) Box plots comparing volumes and mean intensities of RING1B-Halo-JF<sub>549</sub> nuclear foci in PRC1<sup>CPM</sup> ESCs before ( $n_{\text{cells}} = 69$ ) and after OHT treatment ( $n_{\text{cells}} = 83$ ). P-values denote statistical significance calculated by a Wilcoxon rank sum test.
- (D) Box plots comparing numbers of RING1B-Halo-JF<sub>549</sub> nuclear foci detected in PRC1<sup>CPM</sup> ESCs before ( $n_{\text{cells}} = 69$ ) and after OHT treatment ( $n_{\text{cells}} = 83$ ), with foci divided into quartiles based on focus volume (*left*) or mean intensities (*right*) in untreated cells (from lowest Q1 to highest Q4). This shows that loss of PRC1 catalysis had the strongest effect on RING1B nuclear foci with the largest volume and mean intensity, while the foci with low to moderate intensities/volumes remained largely unchanged or even increased. This is in agreement with changes in RING1B occupancy by cChIP-seq at target sites with different levels of RING1B binding in untreated cells.
- (E) Scatter plots showing the relationship between the cChIP-seq signals of RING1B and PCGF2 at RING1B-bound sites in PRC1<sup>CPM</sup> ESCs before (UNT) and after OHT treatment (OHT).  $R^2$  represents coefficient of determination for linear regression and *cor* denotes Pearson correlation coefficient.
- (F) As in (E) for RING1B and SUZ12 cChIP-seq (*left*) and RING1B and H3K27me3 cChIP-seq (*right*).
- (G) As in (E) for RING1B and PCGF1 cChIP-seq (*left*) and RING1B and PCGF6 cChIP-seq (*right*).
- (H) Scatter plots showing the relationship between the cChIP-seq signal for RING1B at RING1B-bound sites in PRC1<sup>CPM</sup> ESCs before (UNT) and after OHT treatment (OHT) with BioCAP-seq (*left*) or MAX ChIP-seq signal (*right*) in wild-type ESCs.  $R^2$  represents coefficient of determination for linear regression and *cor* denotes Pearson correlation coefficient.
- (I) Box plots of RING1B, PCGF2, PCGF1 and PCGF6 cChIP-seq signal in untreated (UNT, blue) and OHT-treated (OHT, red) PRC1<sup>CPM</sup> ESCs at promoter-proximal RING1B-bound sites divided into quartiles based on the expression level of the associated gene in untreated cells (from lowest Q1 to highest Q4).
- (J) Relative enrichment of H2AK119ub1 and H3K27me3 cChIP-seq signal in untreated PRC1<sup>CPM</sup> ESCs and H3K4me3 and MAX ChIP-seq, as well as BioCAP-seq signal in wild-type ESCs across promoter-proximal RING1B-bound sites divided into percentiles based on the expression level of the associated gene in untreated PRC1<sup>CPM</sup> cells. For each factor, enrichment is shown relative to the fiftieth percentile. Lines represent smoothed conditional means based on loess local regression fitting.

(A)

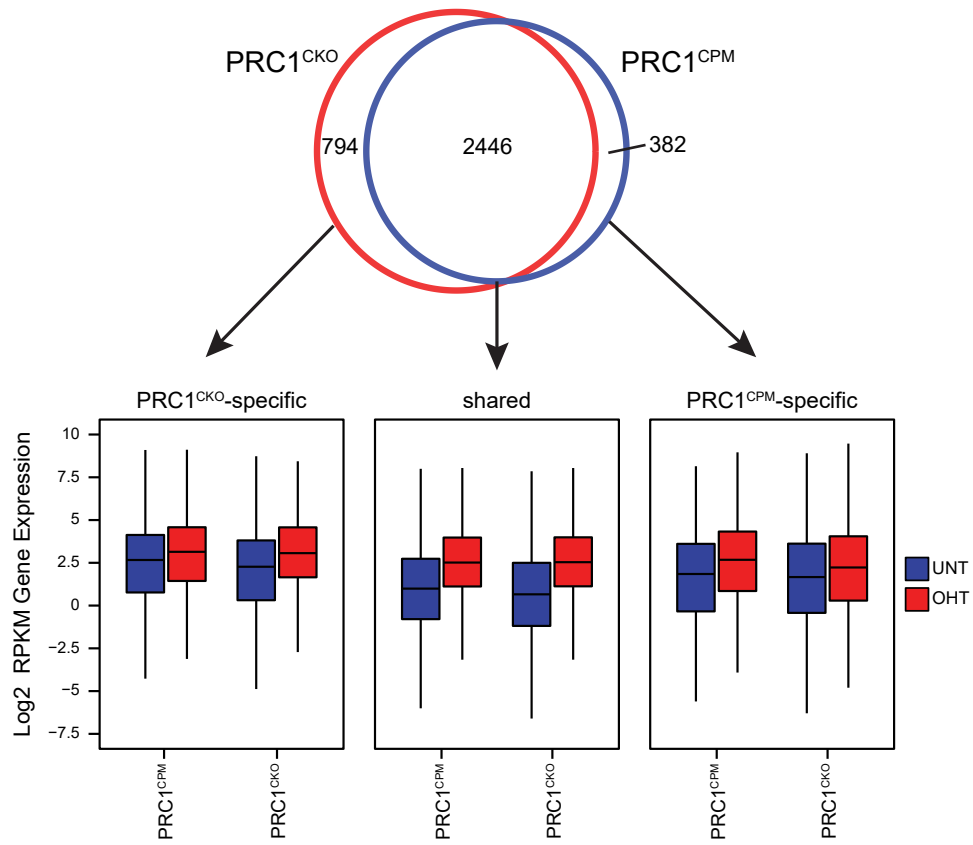

(B)

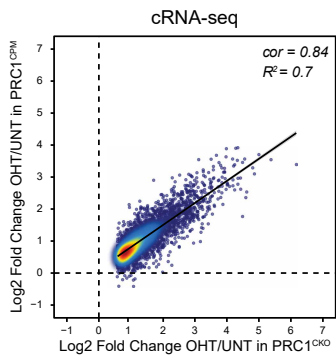

(C)

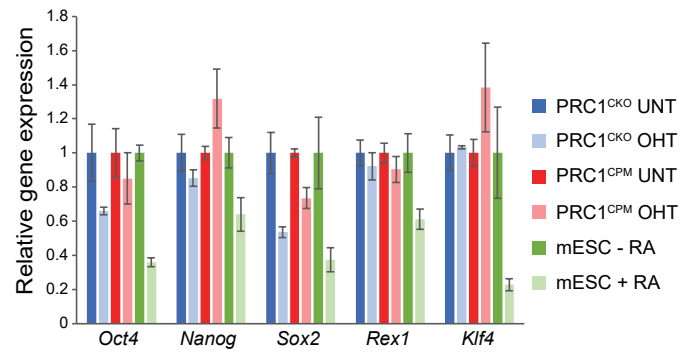

Figure S6

**Figure S6. Related to Figure 6.**

- (A) Top panel:** A Venn diagram showing the overlap between the genes derepressed ( $p\text{-adj} < 0.05$  and  $> 1.5\text{-fold}$ ) in PRC1<sup>CKO</sup> (red) and PRC1<sup>CPM</sup> (blue) ESCs following OHT treatment.
- Bottom panel:** Box plots comparing the gene expression levels from cRNA-seq in PRC1<sup>CPM</sup> and PRC1<sup>CKO</sup> ESCs before (UNT) and after OHT treatment (OHT) for three groups of derepressed genes defined in the Venn diagram above: PRC1<sup>CKO</sup>-specific, shared between PRC1<sup>CKO</sup> and PRC1<sup>CPM</sup> ESCs, and PRC1<sup>CPM</sup>-specific. This demonstrates that for the genes categorised as specifically derepressed in either PRC1<sup>CKO</sup> or PRC1<sup>CPM</sup> OHT-treated ESCs, the magnitude of gene expression changes is more modest than for the shared targets, making them more sensitive to the choice of a significance threshold. Importantly, expression levels of these genes following OHT treatment are highly similar between the two cell lines.
- (B)** A scatter plot comparing the log<sub>2</sub> fold changes in gene expression in cRNA-seq following OHT treatment in PRC1<sup>CPM</sup> and PRC1<sup>CKO</sup> ESCs for PRC1-repressed genes.  $R^2$  represents coefficient of determination for linear regression and  $cor$  denotes Pearson correlation coefficient.
- (C)** Expression of key pluripotency-associated genes in PRC1<sup>CKO</sup> and PRC1<sup>CPM</sup> cells, as well as in ESCs before (-RA) and after 72 hr retinoic acid treatment (+RA) to induce differentiation. Read counts from cRNA-seq (PRC1<sup>CKO</sup> and PRC1<sup>CPM</sup>) or 4sU RNA-seq (-RA and +RA ESCs (Dimitrova et al., 2018)) were normalised to gene expression in the corresponding untreated cells. Error bars show SEM (n=3).

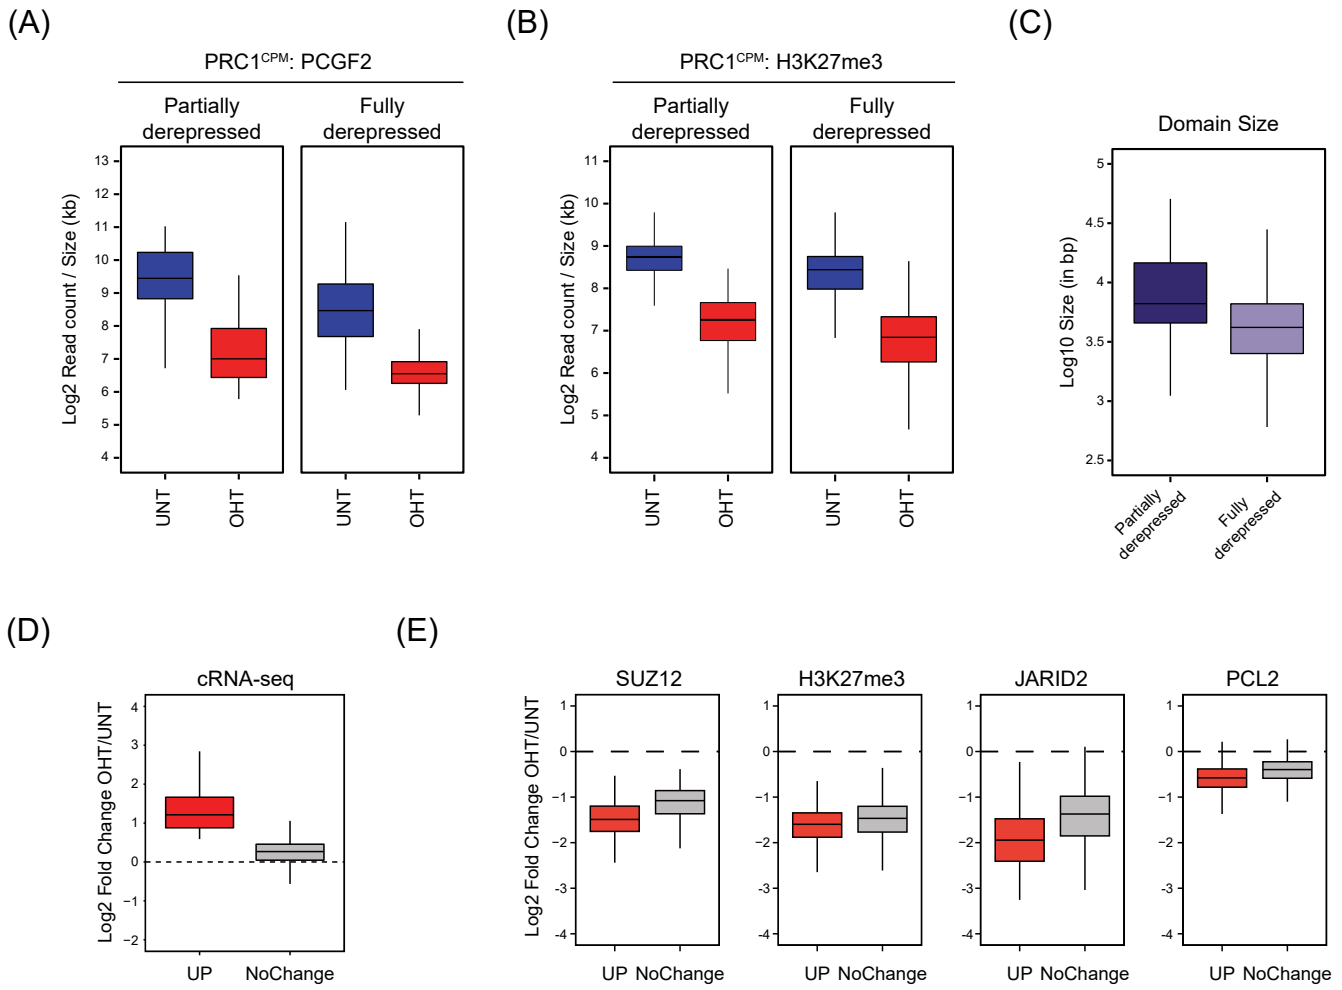

Figure S7

**Figure S7. Related to Figure 7.**

- (A)** Box plots of PCGF2 cChIP-seq signal in PRC1<sup>CPM</sup> cells before (UNT) and after OHT treatment (OHT) at RING1B-bound sites associated with the promoters of PRC1-repressed genes which are either partially (n = 241) or fully derepressed (n = 2241) following loss of PRC1 catalysis as compared to a complete loss of PRC1.
- (B)** As in (A) for H3K27me3 cChIP-seq.
- (C)** Box plots comparing sizes of RING1B-bound sites overlapping with the promoters of PRC1-repressed genes which are either partially (n = 241) or fully derepressed (n = 2241) following OHT treatment in PRC1<sup>CPM</sup> as compared to PRC1<sup>CKO</sup> ESCs.
- (D)** Box plots of log2 fold expression changes (cRNA-seq) for genes associated with PcG-occupied sites which show a significant reduction in SUZ12 levels following OHT treatment in PRC1<sup>CPM</sup> cells, divided into genes that become derepressed (p-adj < 0.05 and > 1.5-fold) following loss of PRC1 catalysis (UP, n = 1766) and those that do not change in expression (NoChange, n = 1779).
- (E)** Box plots of log2 fold changes in PRC2 (SUZ12, JARID2 and PCL2) and H3K27me3 cChIP-seq signal at promoter-proximal PcG-occupied sites which show a significant reduction in SUZ12 levels following OHT treatment in PRC1<sup>CPM</sup> cells, divided into sites which are associated with genes that become derepressed (p-adj < 0.05 and > 1.5-fold) following loss of PRC1 catalysis (UP, n = 1766) and those that do not change in expression (NoChange, n = 1779).
